# Supplementary material for: A Novel Fluidic Platform for Semi-Automated Cell Culture into Multiwell-like Bioreactors
Source: MDPI journal article supplement (doi:10.3390/mi13070994), 2022-06-24
Supplement: s1 [file s1]

# A novel fluidic platform for semi-automated cell culture into multiwell-like bioreactors

Francesca Maria Orecchio<sup>1</sup>, Vito Tommaso<sup>2</sup>, Tommaso Santaniello<sup>1,\*</sup>, Sara Castiglioni<sup>2</sup>, Federico Pezzotta<sup>1</sup>, Andrea Monti<sup>3</sup>, Francesco Butera<sup>3</sup>, Jeanette Anne Marie Maier<sup>1,2</sup>, Paolo Milani<sup>1</sup>

<sup>1</sup> Interdisciplinary Centre of Excellence for Nanostructured Materials and Interfaces (C.I.Ma.I.Na.), Department of Physics, University of Milan, Via Giovanni Celoria, 16, 20133 Milan.

<sup>2</sup> Department of Biomedical and Clinical Sciences "L. Sacco", University of Milan, Via Giovanni Battista Grassi 74, 20157 Milan.

<sup>3</sup> Dolphin Fluidics S.r.l., Via Leonardo Da Vinci, 40, 20094 Corsico (MI).

\* Correspondence: TS Tommaso.santaniello@unimi.it; Tel.+39-2-50317437;

## Supplementary Material

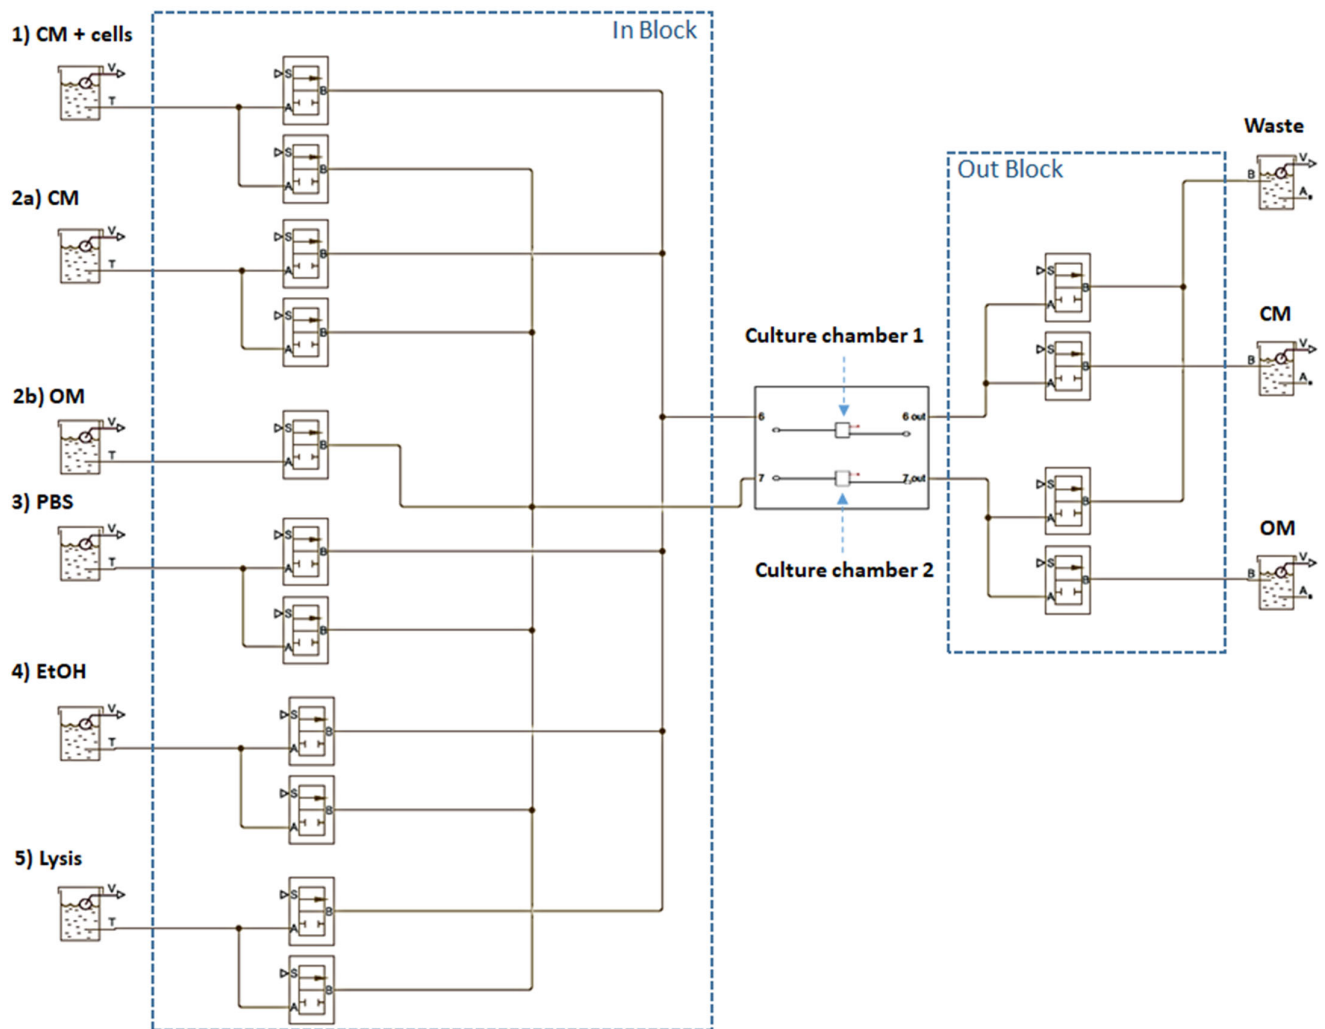

**Figure S1.** Schematic diagram of the fluidic circuit of the control platform.
